# Supplementary material
Source: PubMed Central journal article supplement (PMC5394858)
Supplement: 0a509da73a14acdf78cec3705094bde1_2016_148825-Disclosures_and_Contributions.pdf [file 0a509da73a14acdf78cec3705094bde1_2016_148825-Disclosures_and_Contributions.pdf]

Haematologica  
HAEMATOL/2016/148825  
Version 3

An operational definition of primary refractory acute myeloid leukaemia allowing early identification of patients who may benefit from allogeneic stem cell transplantation

Paul Ferguson, Robert K. Hills, Angela Grech, Sophie Betteridge, Lars Kjeldsen, Michael Dennis, Paresh Vyas, Anthony H. Goldstone, Donald Milligan, Richard E. Clark, Nigel H. Russell, and Charles Craddock

Disclosures: There are no financial conflicts of interest to declare for any of the authors.

Contributions: P. F. and C. C. contributed to the literature research, study design, data interpretation and writing of the final manuscript. R.H. contributed to the study design, data collection, data analysis, data interpretation and aided in the writing of the final manuscript. A.G. and S. B. carried out data collection. L K., A. G. and D. M. aided with patient recruitment. M.D., P. V, R. C. and N. R. carried out patient recruitment, data interpretation and aided with the writing of the final manuscript.
