# Supplementary material
Source: PubMed Central journal article supplement (PMC5394858)
Supplement: 2016.148825.FERGUSON_SUPPL.pdf [file 2016.148825.FERGUSON_SUPPL.pdf]

## An operational definition of primary refractory acute myeloid leukemia allowing early identification of patients who may benefit from allogeneic stem cell transplantation

Paul Ferguson,<sup>1</sup> Robert K. Hills,<sup>2</sup> Angela Grech,<sup>2</sup> Sophie Betteridge,<sup>2</sup> Lars Kjeldsen,<sup>3</sup> Michael Dennis,<sup>4</sup> Paresh Vyas,<sup>5</sup> Anthony H. Goldstone,<sup>6</sup> Donald Milligan,<sup>7</sup> Richard E. Clark,<sup>8</sup> Nigel H. Russell<sup>9</sup> and Charles Craddock<sup>10</sup> on behalf of the UK NCRI AML Working Group

<sup>1</sup>Queen Elizabeth Hospital Birmingham NHS Foundation Trust, UK; <sup>2</sup>Cardiff University School of Medicine, UK; <sup>3</sup>Copenhagen University Hospital, Denmark; <sup>4</sup>The Christie NHS Foundation Trust, Manchester, UK; <sup>5</sup>University of Oxford and Oxford University Hospitals NHS Trust, UK; <sup>6</sup>University College Hospital, London, UK; <sup>7</sup>Birmingham Heartlands Hospital, UK; <sup>8</sup>Royal Liverpool University Hospital, UK; <sup>9</sup>Nottingham University Hospital, UK; and <sup>10</sup>University of Birmingham, UK

©2016 Ferrata Storti Foundation. This is an open-access paper. doi:10.3324/haematol.2016.148825

Received: May 9, 2016.

Accepted: August 10, 2016.

Pre-published: August 18, 2016.

Correspondence: charles.craddock@uhb.nhs.uk

---

## Supplementary Material

Supplementary Figure 1: Randomisation and treatment arms with drug doses and scheduling for MRC/NCRN AML Trials a) AML 10 b) AML 11 c) AML 12 rota A (Pre-protocol amendment) d) AML 12 rota B (Post-protocol amendment) e) AML 14 f) AML 15 g) AML 16.

a) AML 10

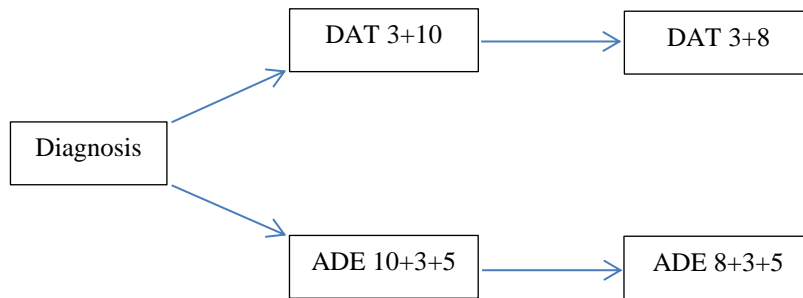

| Regimen           | Dose(mg/m <sup>2</sup> ) | Timing               |
|-------------------|--------------------------|----------------------|
| <b>DAT 3+10</b>   |                          |                      |
| Daunorubicin      | 50                       | Daily, Days 1, 3, 5  |
| Cytarabine        | 100                      | Every 12h, Days 1-10 |
| Thioguanine       | 100                      | Every 12h, Days 1-10 |
| <b>DAT 3+8</b>    |                          |                      |
| Daunorubicin      | 50                       | Daily, Days 1, 3, 5  |
| Cytarabine        | 100                      | Every 12h, Days 1-8  |
| Thioguanine       | 100                      | Every 12h, Days 1-8  |
| <b>ADE 10+3+5</b> |                          |                      |
| Cytarabine        | 100                      | Every 12h, Days 1-10 |
| Daunorubicin      | 50                       | Daily, Days 1, 3, 5  |
| Etoposide         | 100                      | Daily, Days 1-5      |
| <b>ADE 8+3+5</b>  |                          |                      |
| Cytarabine        | 100                      | Every 12h, Days 1-8  |
| Daunorubicin      | 50                       | Daily, Days 1, 3, 5  |
| Etoposide         | 100                      | Daily, Days 1-5      |

b) AML 11

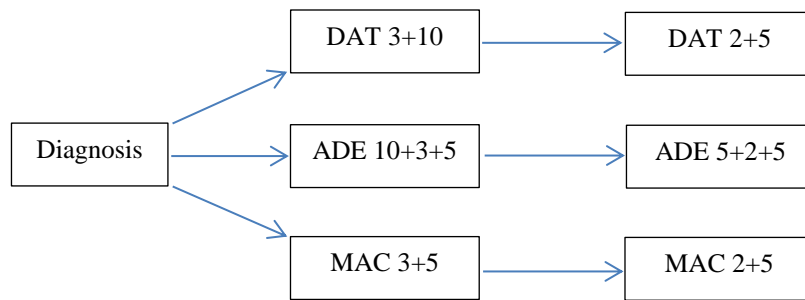

| Regimen           | Dose(mg/m <sup>2</sup> ) | Timing               |
|-------------------|--------------------------|----------------------|
| <b>DAT 3+10</b>   |                          |                      |
| Daunorubicin      | 50                       | Daily, Days 1, 3, 5  |
| Cytarabine        | 100                      | Every 12h, Days 1-10 |
| Thioguanine       | 100                      | Every 12h, Days 1-10 |
| <b>DAT 2+5</b>    |                          |                      |
| Daunorubicin      | 50                       | Daily, Days 1, 3     |
| Cytarabine        | 100                      | Every 12h, Days 1-5  |
| Thioguanine       | 100                      | Every 12h, Days 1-5  |
| <b>ADE 10+3+5</b> |                          |                      |
| Cytarabine        | 100                      | Every 12h, Days 1-10 |
| Daunorubicin      | 50                       | Daily, Days 1, 3, 5  |
| Etoposide         | 100                      | Daily, Days 1-5      |
| <b>ADE 5+2+5</b>  |                          |                      |
| Cytarabine        | 100                      | Every 12h, Days 1-5  |
| Daunorubicin      | 50                       | Daily, Days 1, 3     |
| Etoposide         | 100                      | Daily, Days 1-5      |
| <b>MAC 3+5</b>    |                          |                      |
| Mitoxantrone      | 12                       | Daily, Days 1-3      |
| Cytarabine        | 100                      | Every 12h, Days 1-5  |
| <b>MAC 2+5</b>    |                          |                      |
| Mitoxantrone      | 12                       | Daily, Days 1-2      |
| Cytarabine        | 100                      | Every 12h, Days 1-5  |

c) AML 12 Rota A (Pre-protocol amendment)

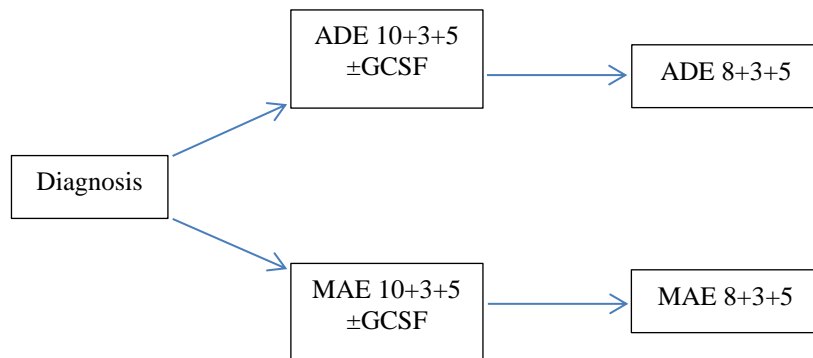

| Regimen           | Dose(mg/m <sup>2</sup> ) | Timing               |
|-------------------|--------------------------|----------------------|
| <b>ADE 10+3+5</b> |                          |                      |
| Cytarabine        | 100                      | Every 12h, Days 1-10 |
| Daunorubicin      | 50                       | Daily, Days 1, 3, 5  |
| Etoposide         | 100                      | Daily, Days 1-5      |
| <b>ADE 8+3+5</b>  |                          |                      |
| Cytarabine        | 100                      | Every 12h, Days 1-8  |
| Daunorubicin      | 50                       | Daily, Days 1, 3, 5  |
| Etoposide         | 100                      | Daily, Days 1-5      |
| <b>MAE 10+3+5</b> |                          |                      |
| Mitoxantrone      | 12                       | Daily, Days 1-3      |
| Cytarabine        | 100                      | Every 12h, Days 1-10 |
| Etoposide         | 100                      | Daily, Days 1-5      |
| <b>MAE 8+3+5</b>  |                          |                      |
| Mitoxantrone      | 12                       | Daily, Days 1-3      |
| Cytarabine        | 100                      | Every 12h, Days 1-10 |
| Etoposide         | 100                      | Daily, Days 1-5      |

d) AML rota B (Post-protocol amendment)

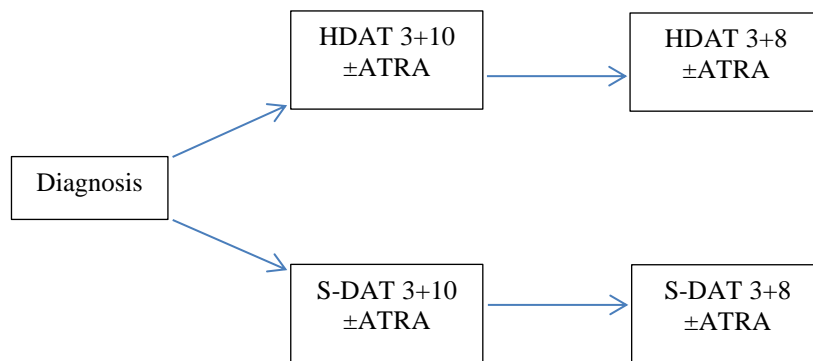

| Regimen           | Dose(mg/m <sup>2</sup> ) | Timing               |
|-------------------|--------------------------|----------------------|
| <b>H-DAT 3+10</b> |                          |                      |
| Daunorubicin      | 50                       | Daily, Days 1, 3, 5  |
| Cytarabine        | 200                      | Every 12h, Days 1-10 |
| Thioguanine       | 100                      | Every 12h, Days 1-10 |
| <b>H-DAT 3+8</b>  |                          |                      |
| Daunorubicin      | 50                       | Daily, Days 1, 3, 5  |
| Cytarabine        | 200                      | Every 12h, Days 1-8  |
| Thioguanine       | 100                      | Every 12h, Days 1-8  |
| <b>S-DAT 3+10</b> |                          |                      |
| Daunorubicin      | 50                       | Daily, Days 1, 3, 5  |
| Cytarabine        | 100                      | Every 12h, Days 1-10 |
| Thioguanine       | 100                      | Every 12h, Days 1-10 |
| <b>S-DAT 3+8</b>  |                          |                      |
| Daunorubicin      | 50                       | Daily, Days 1, 3, 5  |
| Cytarabine        | 100                      | Every 12h, Days 1-8  |
| Thioguanine       | 100                      | Every 12h, Days 1-8  |

e) AML 14

| <b>Regimen</b>  | <b>Dose(mg/m<sup>2</sup>)</b> | <b>Timing</b>        |
|-----------------|-------------------------------|----------------------|
| <b>Course 1</b> |                               |                      |
| <b>DAT 3+10</b> |                               |                      |
| Daunorubicin    | 35 or 50                      | Daily, Days 1, 3, 5  |
| Cytarabine      | 200 or 400                    | Every 12h, Days 1-10 |
| Thioguanine     | 100                           | Every 12h, Days 1-10 |
| ±PSC 833        | 2mg/kg + 10mg/kg/24hr         | Days 1-3             |
| <b>Course 2</b> |                               |                      |
| <b>DAT 3+8</b>  |                               |                      |
| Daunorubicin    | 35 or 50                      | Daily, Days 1, 3, 5  |
| Cytarabine      | 200 or 400                    | Every 12h, Days 1-8  |
| Thioguanine     | 100                           | Every 12h, Days 1-8  |
| ±PSC 833        | 2mg/kg + 10mg/kg/24hr         | Days 1-3             |

f) AML 15

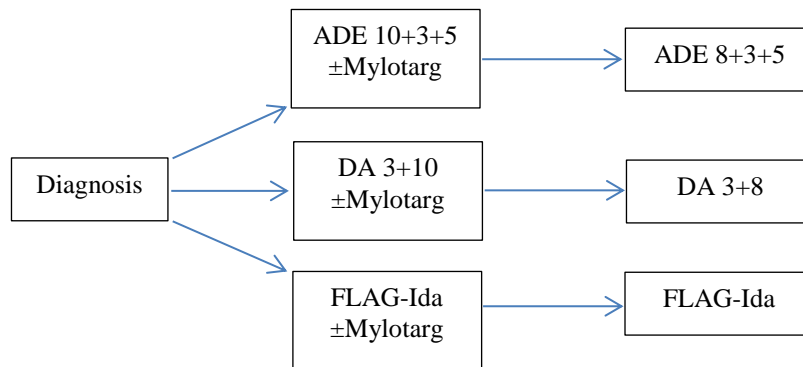

| Regimen               | Dose(mg/m <sup>2</sup> ) | Timing               |
|-----------------------|--------------------------|----------------------|
| <b>ADE 10+3+5</b>     |                          |                      |
| Cytarabine            | 100                      | Every 12h, Days 1-10 |
| Daunorubicin          | 50                       | Daily, Days 1, 3, 5  |
| Etoposide             | 100                      | Daily, Days 1-5      |
| <b>ADE 8+3+5</b>      |                          |                      |
| Cytarabine            | 100                      | Every 12h, Days 1-8  |
| Daunorubicin          | 50                       | Daily, Days 1, 3, 5  |
| Etoposide             | 100                      | Daily, Days 1-5      |
| <b>DA 3+10</b>        |                          |                      |
| Daunorubicin          | 50                       | Daily, Days 1, 3, 5  |
| Cytarabine            | 100                      | Every 12h, Days 1-10 |
| <b>DA 3+8</b>         |                          |                      |
| Daunorubicin          | 50                       | Daily, Days 1, 3, 5  |
| Cytarabine            | 100                      | Every 12h, Days 1-8  |
| <b>FLAG-Ida</b>       |                          |                      |
| Fludarabine           | 30                       | Daily, Days 2-6      |
| Cytarabine            | 2000                     | Daily, Days 2-6      |
| GCSF (Lenograstim)    | 263µg STAT               | Daily, Days 1-7      |
| Idarubicin            | 8                        | Daily, Days 4-6      |
| <b>Mylotarg</b>       |                          |                      |
| Gemtuzumab ozogamicin | 3                        | Day 1                |

g) AML 16

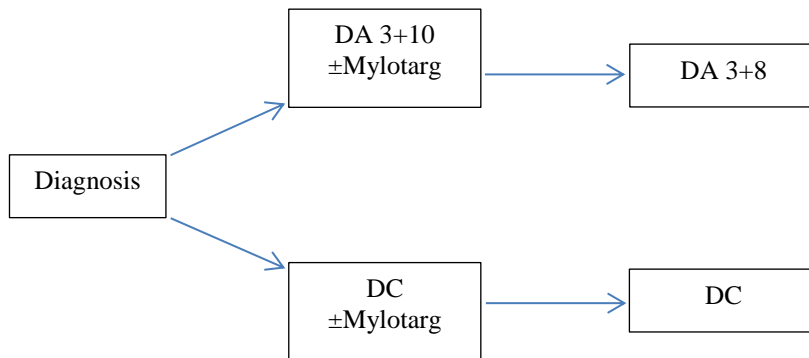

| Regimen               | Dose(mg/m <sup>2</sup> ) | Timing               |
|-----------------------|--------------------------|----------------------|
| <b>DA 3+10</b>        |                          |                      |
| Daunorubicin          | 50                       | Daily, Days 1, 3, 5  |
| Cytarabine            | 100                      | Every 12h, Days 1-10 |
| <b>DA 3+8</b>         |                          |                      |
| Daunorubicin          | 50                       | Daily, Days 1, 3, 5  |
| Cytarabine            | 100                      | Every 12h, Days 1-8  |
| <b>DC</b>             |                          |                      |
| Daunorubicin          | 50                       | Daily, Days 1, 3, 5  |
| Clofarabine           | 100                      | Daily, Days 1-5      |
| <b>Mylotarg</b>       |                          |                      |
| Gemtuzumab ozogamicin | 3                        | Day 1                |



**Table 1:** Demographics of patients in the defined cohorts studied.

| Category           | RES            | PR         | REF 1          | REF2           |
|--------------------|----------------|------------|----------------|----------------|
| Total              | 2548           | 1746       | 802            | 473            |
| Trial              |                |            |                |                |
| AML10              | 374 (15%)      | 263 (15%)  | 111 (14%)      | 100 (21%)      |
| AML11              | 412 (16%)      | 261 (15%)  | 151 (19%)      | 96 (20%)       |
| AML12              | 500 (20%)      | 350 (20%)  | 150 (19%)      | 61 (13%)       |
| AML14              | 274 (11%)      | 196 (11%)  | 78 (10%)       | 30 (6%)        |
| AML15              | 514 (23%)      | 392 (22%)  | 182 (23%)      | 97 (21%)       |
| AML16              | 414 (16%)      | 284 (16%)  | 130 (16%)      | 89 (19%)       |
| Age                |                |            |                |                |
| 16-29              | 216 (8%)       | 160 (9%)   | 56 (7%)        | 50 (11%)       |
| 30-39              | 258 (10%)      | 167 (10%)  | 91 (11%)       | 44 (9%)        |
| 40-49              | 381 (15%)      | 275 (16%)  | 06 (13%)       | 71 (15%)       |
| 50-59              | 540 (21%)      | 367 (21%)  | 173 (22%)      | 88 (19%)       |
| 60-69              | 832 (33%)      | 556 (32%)  | 276 (34%)      | 155 (33%)      |
| 70+                | 321 (13%)      | 221 (13%)  | 100 (12%)      | 65 (14%)       |
| Median (range)     | 58 (16-82)     |            | 58 (16-80)     | 58 (16-79)     |
| Sex                |                |            |                |                |
| Female             | 1129 (44%)     | 803 (46%)  | 326 (41%)      | 192 (41%)      |
| Male               | 1419 (56%)     | 943 (54%)  | 476 (59%)      | 281 (59%)      |
| Diagnosis          |                |            |                |                |
| De Novo            | 2094 (82%)     | 1419 (81%) | 675 (84%)      | 390 (82%)      |
| Secondary          | 454 (18%)      | 327 (19%)  | 127 (16%)      | 83 (18%)       |
| Performance Status |                |            |                |                |
| WHO 0              | 1333 (52%)     | 910 (52%)  | 423 (53%)      | 232 (49%)      |
| WHO 1              | 737 (29%)      | 496 (28%)  | 241 (30%)      | 132 (28%)      |
| WHO 2              | 321 (13%)      | 226 (13%)  | 95 (12%)       | 77 (16%)       |
| WHO 3              | 138 (5%)       | 103 (6%)   | 35 (4%)        | 26 (5%)        |
| WHO 4              | 19 (1%)        | 11 (1%)    | 8 (1)          | 6 (1%)         |
| WBC                |                |            |                |                |
| 0-9.9              | 861 (34%)      | 604 (35%)  | 257 (32%)      | 113 (24)       |
| 10-49.9            | 764 (30%)      | 528 (30%)  | 236 (29%)      | 139 (29)       |
| 50-99.9            | 866 (34%)      | 575 (33%)  | 291 (36%)      | 212 (45)       |
| 100+               | 57 (2%)        | 39 (2%)    | 18 (2%)        | 9 (2)          |
| Unknown            | 0              | 0          | 0              | 0              |
| Median (range)     | 30.9 (0.3-454) |            | 30.9 (0.6-454) | 30.9 (0.6-291) |
| Cytogenetics       |                |            |                |                |
| Favourable         | 73 (3%)        | 66 (5%)    | 7 (1%)         | 4 (1%)         |
| Intermediate       | 1479 (70%)     | 1070 (73%) | 409 (62%)      | 267 (68%)      |

|                           |                  |                  |                  |                 |
|---------------------------|------------------|------------------|------------------|-----------------|
| Adverse Unknown           | 571 (27%)<br>425 | 328 (22%)<br>282 | 243 (37%)<br>143 | 119 (31%)<br>83 |
| ITD mutation              |                  |                  |                  |                 |
| WT                        | 765 (78%)        | 517 (77%)        | 248 (80%)        | 133 (77%)       |
| Mutant                    | 219 (22%)        | 158 (23%)        | 61 (20%)         | 39 (22)         |
| Unknown                   | 1564             | 1071             | 493              | 301             |
| NPM mutation              |                  |                  |                  |                 |
| WT                        | 740 (79%)        | 489 (75%)        | 251 (87%)        | 138 (84%)       |
| Mutant                    | 198 (21%)        | 161 (25%)        | 37 (13%)         | 26 (16%)        |
| Unknown                   | 1610             | 1096             | 514              | 309             |
| Status post C1            |                  |                  |                  |                 |
| Not "refractory (Ref 1b)" | 1375 (63%)       |                  |                  | 226 (52%)       |
| "Refractory"              |                  |                  |                  | 208 (48%)       |
| Not known                 | 802 (37%)<br>371 |                  |                  | 39              |
